# Supplementary material
Source: ML conference proceedings conference paper supplement (https://proceedings.mlr.press/v164/weng22a.html)
Supplement: Supplementary file 2 [file weng22a-supp.zip]

Archive with 1,609 entries (1,608 files):
- __MACOSX/._fabricflownet_supplement
- __MACOSX/fabricflownet_supplement/._.DS_Store
- __MACOSX/fabricflownet_supplement/._README.md
- __MACOSX/fabricflownet_supplement/._appendix.pdf
- __MACOSX/fabricflownet_supplement/._code
- __MACOSX/fabricflownet_supplement/code/._FabricFlowNet
- __MACOSX/fabricflownet_supplement/code/._README.md
- __MACOSX/fabricflownet_supplement/code/._baselines
- __MACOSX/fabricflownet_supplement/code/._goals
- __MACOSX/fabricflownet_supplement/code/FabricFlowNet/._.DS_Store
- __MACOSX/fabricflownet_supplement/code/FabricFlowNet/._End2End
- __MACOSX/fabricflownet_supplement/code/FabricFlowNet/._FlowNet
- __MACOSX/fabricflownet_supplement/code/FabricFlowNet/._PickNet
- __MACOSX/fabricflownet_supplement/code/FabricFlowNet/End2End/._config.yaml
- __MACOSX/fabricflownet_supplement/code/FabricFlowNet/End2End/._dataset.py
- __MACOSX/fabricflownet_supplement/code/FabricFlowNet/End2End/._evaluate.py
- __MACOSX/fabricflownet_supplement/code/FabricFlowNet/End2End/._flow_utils.py
- __MACOSX/fabricflownet_supplement/code/FabricFlowNet/End2End/._models.py
- __MACOSX/fabricflownet_supplement/code/FabricFlowNet/End2End/._rollout_split.py
- __MACOSX/fabricflownet_supplement/code/FabricFlowNet/End2End/._test.py
- __MACOSX/fabricflownet_supplement/code/FabricFlowNet/End2End/._train.py
- __MACOSX/fabricflownet_supplement/code/FabricFlowNet/FlowNet/._config.yaml
- __MACOSX/fabricflownet_supplement/code/FabricFlowNet/FlowNet/._dataset.py
- __MACOSX/fabricflownet_supplement/code/FabricFlowNet/FlowNet/._evaluate.py
- __MACOSX/fabricflownet_supplement/code/FabricFlowNet/FlowNet/._flow_utils.py
- __MACOSX/fabricflownet_supplement/code/FabricFlowNet/FlowNet/._models.py
- __MACOSX/fabricflownet_supplement/code/FabricFlowNet/FlowNet/._test.py
- __MACOSX/fabricflownet_supplement/code/FabricFlowNet/FlowNet/._train.py
- __MACOSX/fabricflownet_supplement/code/FabricFlowNet/PickNet/._collect_data_bimanual.py
- __MACOSX/fabricflownet_supplement/code/FabricFlowNet/PickNet/._config.yaml
- __MACOSX/fabricflownet_supplement/code/FabricFlowNet/PickNet/._dataset.py
- __MACOSX/fabricflownet_supplement/code/FabricFlowNet/PickNet/._flow.py
- __MACOSX/fabricflownet_supplement/code/FabricFlowNet/PickNet/._flow_model
- __MACOSX/fabricflownet_supplement/code/FabricFlowNet/PickNet/._models.py
- __MACOSX/fabricflownet_supplement/code/FabricFlowNet/PickNet/._rollout_split.py
- __MACOSX/fabricflownet_supplement/code/FabricFlowNet/PickNet/._train_split.py
- __MACOSX/fabricflownet_supplement/code/FabricFlowNet/PickNet/._utils.py
- __MACOSX/fabricflownet_supplement/code/FabricFlowNet/PickNet/flow_model/._epoch=613.ckpt
- __MACOSX/fabricflownet_supplement/code/baselines/._Fabric-VSF
- __MACOSX/fabricflownet_supplement/code/baselines/._Lee-etal
- __MACOSX/fabricflownet_supplement/code/baselines/Fabric-VSF/._chester
- __MACOSX/fabricflownet_supplement/code/baselines/Fabric-VSF/._fabric_vsf
- __MACOSX/fabricflownet_supplement/code/baselines/Fabric-VSF/chester/._README.md
- __MACOSX/fabricflownet_supplement/code/baselines/Fabric-VSF/chester/._config.py
- __MACOSX/fabricflownet_supplement/code/baselines/Fabric-VSF/chester/._config_ec2.py
- __MACOSX/fabricflownet_supplement/code/baselines/Fabric-VSF/chester/._examples
- __MACOSX/fabricflownet_supplement/code/baselines/Fabric-VSF/chester/._logger.py
- __MACOSX/fabricflownet_supplement/code/baselines/Fabric-VSF/chester/._plotting
- __MACOSX/fabricflownet_supplement/code/baselines/Fabric-VSF/chester/._pull_result.py
- __MACOSX/fabricflownet_supplement/code/baselines/Fabric-VSF/chester/._rsync_exclude
- __MACOSX/fabricflownet_supplement/code/baselines/Fabric-VSF/chester/._rsync_include
- __MACOSX/fabricflownet_supplement/code/baselines/Fabric-VSF/chester/._run_exp.py
- __MACOSX/fabricflownet_supplement/code/baselines/Fabric-VSF/chester/._run_exp_worker.py
- __MACOSX/fabricflownet_supplement/code/baselines/Fabric-VSF/chester/._slurm.py
- __MACOSX/fabricflownet_supplement/code/baselines/Fabric-VSF/chester/._utils_s3.py
- __MACOSX/fabricflownet_supplement/code/baselines/Fabric-VSF/chester/examples/._cplot_example.py
- __MACOSX/fabricflownet_supplement/code/baselines/Fabric-VSF/chester/examples/._pgm_plot.py
- __MACOSX/fabricflownet_supplement/code/baselines/Fabric-VSF/chester/examples/._presets.py
- __MACOSX/fabricflownet_supplement/code/baselines/Fabric-VSF/chester/examples/._presets2.py
- __MACOSX/fabricflownet_supplement/code/baselines/Fabric-VSF/chester/examples/._presets3.py
- __MACOSX/fabricflownet_supplement/code/baselines/Fabric-VSF/chester/examples/._presets_tiancheng.py
- __MACOSX/fabricflownet_supplement/code/baselines/Fabric-VSF/chester/examples/._train.py
- __MACOSX/fabricflownet_supplement/code/baselines/Fabric-VSF/chester/examples/._train_launch.py
- __MACOSX/fabricflownet_supplement/code/baselines/Fabric-VSF/chester/plotting/._cplot.py
- __MACOSX/fabricflownet_supplement/code/baselines/Fabric-VSF/fabric_vsf/._.gitignore
- __MACOSX/fabricflownet_supplement/code/baselines/Fabric-VSF/fabric_vsf/._README.md
- __MACOSX/fabricflownet_supplement/code/baselines/Fabric-VSF/fabric_vsf/._analysis
- __MACOSX/fabricflownet_supplement/code/baselines/Fabric-VSF/fabric_vsf/._cfg
- __MACOSX/fabricflownet_supplement/code/baselines/Fabric-VSF/fabric_vsf/._examples
- __MACOSX/fabricflownet_supplement/code/baselines/Fabric-VSF/fabric_vsf/._gym_cloth
- __MACOSX/fabricflownet_supplement/code/baselines/Fabric-VSF/fabric_vsf/._launch_collect_data.py
- __MACOSX/fabricflownet_supplement/code/baselines/Fabric-VSF/fabric_vsf/._launch_evaluate_model_original.py
- __MACOSX/fabricflownet_supplement/code/baselines/Fabric-VSF/fabric_vsf/._launch_format_data.py
- __MACOSX/fabricflownet_supplement/code/baselines/Fabric-VSF/fabric_vsf/._launch_predict.py
- __MACOSX/fabricflownet_supplement/code/baselines/Fabric-VSF/fabric_vsf/._launch_train.py
- __MACOSX/fabricflownet_supplement/code/baselines/Fabric-VSF/fabric_vsf/._requirements.txt
- __MACOSX/fabricflownet_supplement/code/baselines/Fabric-VSF/fabric_vsf/._scripts
- __MACOSX/fabricflownet_supplement/code/baselines/Fabric-VSF/fabric_vsf/._setup.py
- __MACOSX/fabricflownet_supplement/code/baselines/Fabric-VSF/fabric_vsf/._vismpc
- __MACOSX/fabricflownet_supplement/code/baselines/Fabric-VSF/fabric_vsf/analysis/._README.md
- __MACOSX/fabricflownet_supplement/code/baselines/Fabric-VSF/fabric_vsf/analysis/._check_demo_data.py
- __MACOSX/fabricflownet_supplement/code/baselines/Fabric-VSF/fabric_vsf/analysis/._combine_demo_data.py
- __MACOSX/fabricflownet_supplement/code/baselines/Fabric-VSF/fabric_vsf/analysis/._convert_hdf5_visual_dynamics.py
- __MACOSX/fabricflownet_supplement/code/baselines/Fabric-VSF/fabric_vsf/cfg/._README.md
- __MACOSX/fabricflownet_supplement/code/baselines/Fabric-VSF/fabric_vsf/cfg/.__json_files
- __MACOSX/fabricflownet_supplement/code/baselines/Fabric-VSF/fabric_vsf/cfg/._sim.yaml
- __MACOSX/fabricflownet_supplement/code/baselines/Fabric-VSF/fabric_vsf/cfg/_json_files/._default184.json
- __MACOSX/fabricflownet_supplement/code/baselines/Fabric-VSF/fabric_vsf/cfg/_json_files/._fold.json
- __MACOSX/fabricflownet_supplement/code/baselines/Fabric-VSF/fabric_vsf/cfg/_json_files/._pinned2.json
- __MACOSX/fabricflownet_supplement/code/baselines/Fabric-VSF/fabric_vsf/cfg/_json_files/._pinned4.json
- __MACOSX/fabricflownet_supplement/code/baselines/Fabric-VSF/fabric_vsf/cfg/_json_files/._plane.json
- __MACOSX/fabricflownet_supplement/code/baselines/Fabric-VSF/fabric_vsf/cfg/_json_files/._selfCollision.json
- __MACOSX/fabricflownet_supplement/code/baselines/Fabric-VSF/fabric_vsf/cfg/_json_files/._sphere.json
- __MACOSX/fabricflownet_supplement/code/baselines/Fabric-VSF/fabric_vsf/examples/._README.md
- __MACOSX/fabricflownet_supplement/code/baselines/Fabric-VSF/fabric_vsf/examples/._demo_bed.py
- __MACOSX/fabricflownet_supplement/code/baselines/Fabric-VSF/fabric_vsf/examples/._demo_render.py
- __MACOSX/fabricflownet_supplement/code/baselines/Fabric-VSF/fabric_vsf/examples/._demo_spaces.py
- __MACOSX/fabricflownet_supplement/code/baselines/Fabric-VSF/fabric_vsf/examples/._env_init.py
- __MACOSX/fabricflownet_supplement/code/baselines/Fabric-VSF/fabric_vsf/gym_cloth/.___init__.py
- __MACOSX/fabricflownet_supplement/code/baselines/Fabric-VSF/fabric_vsf/gym_cloth/._blender
- __MACOSX/fabricflownet_supplement/code/baselines/Fabric-VSF/fabric_vsf/gym_cloth/._envs
- __MACOSX/fabricflownet_supplement/code/baselines/Fabric-VSF/fabric_vsf/gym_cloth/._physics
- __MACOSX/fabricflownet_supplement/code/baselines/Fabric-VSF/fabric_vsf/gym_cloth/blender/.___init__.py
- __MACOSX/fabricflownet_supplement/code/baselines/Fabric-VSF/fabric_vsf/gym_cloth/blender/._get_image_rep_279.py
- __MACOSX/fabricflownet_supplement/code/baselines/Fabric-VSF/fabric_vsf/gym_cloth/blender/._test.py
- __MACOSX/fabricflownet_supplement/code/baselines/Fabric-VSF/fabric_vsf/gym_cloth/envs/._README.md
- __MACOSX/fabricflownet_supplement/code/baselines/Fabric-VSF/fabric_vsf/gym_cloth/envs/.___init__.py
- __MACOSX/fabricflownet_supplement/code/baselines/Fabric-VSF/fabric_vsf/gym_cloth/envs/._cloth_env.py
- __MACOSX/fabricflownet_supplement/code/baselines/Fabric-VSF/fabric_vsf/gym_cloth/physics/.___init__.py
- __MACOSX/fabricflownet_supplement/code/baselines/Fabric-VSF/fabric_vsf/gym_cloth/physics/._cloth.pyx
- __MACOSX/fabricflownet_supplement/code/baselines/Fabric-VSF/fabric_vsf/gym_cloth/physics/._gripper.pyx
- __MACOSX/fabricflownet_supplement/code/baselines/Fabric-VSF/fabric_vsf/gym_cloth/physics/._point.pyx
- __MACOSX/fabricflownet_supplement/code/baselines/Fabric-VSF/fabric_vsf/gym_cloth/physics/._util.py
- __MACOSX/fabricflownet_supplement/code/baselines/Fabric-VSF/fabric_vsf/scripts/._collect_data_softgym_original.py
- __MACOSX/fabricflownet_supplement/code/baselines/Fabric-VSF/fabric_vsf/scripts/._format_hdf5_softgym.py
- __MACOSX/fabricflownet_supplement/code/baselines/Fabric-VSF/fabric_vsf/scripts/._read_result.py
- __MACOSX/fabricflownet_supplement/code/baselines/Fabric-VSF/fabric_vsf/scripts/._run.py
- __MACOSX/fabricflownet_supplement/code/baselines/Fabric-VSF/fabric_vsf/scripts/._run_softgym_original.py
- __MACOSX/fabricflownet_supplement/code/baselines/Fabric-VSF/fabric_vsf/scripts/._run_softgym_original_multiple.py
- __MACOSX/fabricflownet_supplement/code/baselines/Fabric-VSF/fabric_vsf/scripts/._train.py
- __MACOSX/fabricflownet_supplement/code/baselines/Fabric-VSF/fabric_vsf/vismpc/._README.md
- __MACOSX/fabricflownet_supplement/code/baselines/Fabric-VSF/fabric_vsf/vismpc/._SV2P.py
- __MACOSX/fabricflownet_supplement/code/baselines/Fabric-VSF/fabric_vsf/vismpc/.___init__.py
- __MACOSX/fabricflownet_supplement/code/baselines/Fabric-VSF/fabric_vsf/vismpc/._cost_functions.py
- __MACOSX/fabricflownet_supplement/code/baselines/Fabric-VSF/fabric_vsf/vismpc/._dqn
- __MACOSX/fabricflownet_supplement/code/baselines/Fabric-VSF/fabric_vsf/vismpc/._make_pkl.py
- __MACOSX/fabricflownet_supplement/code/baselines/Fabric-VSF/fabric_vsf/vismpc/._mpc.py
- __MACOSX/fabricflownet_supplement/code/baselines/Fabric-VSF/fabric_vsf/vismpc/._requirements.txt
- __MACOSX/fabricflownet_supplement/code/baselines/Fabric-VSF/fabric_vsf/vismpc/._scripts
- __MACOSX/fabricflownet_supplement/code/baselines/Fabric-VSF/fabric_vsf/vismpc/._t2t
- __MACOSX/fabricflownet_supplement/code/baselines/Fabric-VSF/fabric_vsf/vismpc/._vae
- __MACOSX/fabricflownet_supplement/code/baselines/Fabric-VSF/fabric_vsf/vismpc/._visualize.py
- __MACOSX/fabricflownet_supplement/code/baselines/Fabric-VSF/fabric_vsf/vismpc/dqn/._dqn.py
- __MACOSX/fabricflownet_supplement/code/baselines/Fabric-VSF/fabric_vsf/vismpc/scripts/._dvrk.py
- __MACOSX/fabricflownet_supplement/code/baselines/Fabric-VSF/fabric_vsf/vismpc/scripts/._format_hdf5.py
- __MACOSX/fabricflownet_supplement/code/baselines/Fabric-VSF/fabric_vsf/vismpc/scripts/._makegif.py
- __MACOSX/fabricflownet_supplement/code/baselines/Fabric-VSF/fabric_vsf/vismpc/scripts/._predict.py
- __MACOSX/fabricflownet_supplement/code/baselines/Fabric-VSF/fabric_vsf/vismpc/scripts/._predict_softgym.py
- __MACOSX/fabricflownet_supplement/code/baselines/Fabric-VSF/fabric_vsf/vismpc/t2t/._AUTHORS
- __MACOSX/fabricflownet_supplement/code/baselines/Fabric-VSF/fabric_vsf/vismpc/t2t/._CONTRIBUTING.md
- __MACOSX/fabricflownet_supplement/code/baselines/Fabric-VSF/fabric_vsf/vismpc/t2t/._ISSUE_TEMPLATE.md
- __MACOSX/fabricflownet_supplement/code/baselines/Fabric-VSF/fabric_vsf/vismpc/t2t/._LICENSE
- __MACOSX/fabricflownet_supplement/code/baselines/Fabric-VSF/fabric_vsf/vismpc/t2t/._README.md
- __MACOSX/fabricflownet_supplement/code/baselines/Fabric-VSF/fabric_vsf/vismpc/t2t/._build
- __MACOSX/fabricflownet_supplement/code/baselines/Fabric-VSF/fabric_vsf/vismpc/t2t/._dist
- __MACOSX/fabricflownet_supplement/code/baselines/Fabric-VSF/fabric_vsf/vismpc/t2t/._docs
- __MACOSX/fabricflownet_supplement/code/baselines/Fabric-VSF/fabric_vsf/vismpc/t2t/._floyd.yml
- __MACOSX/fabricflownet_supplement/code/baselines/Fabric-VSF/fabric_vsf/vismpc/t2t/._floyd_requirements.txt
- __MACOSX/fabricflownet_supplement/code/baselines/Fabric-VSF/fabric_vsf/vismpc/t2t/._oss_scripts
- __MACOSX/fabricflownet_supplement/code/baselines/Fabric-VSF/fabric_vsf/vismpc/t2t/._pylintrc
- __MACOSX/fabricflownet_supplement/code/baselines/Fabric-VSF/fabric_vsf/vismpc/t2t/._setup.py
- __MACOSX/fabricflownet_supplement/code/baselines/Fabric-VSF/fabric_vsf/vismpc/t2t/._tensor2tensor
- __MACOSX/fabricflownet_supplement/code/baselines/Fabric-VSF/fabric_vsf/vismpc/t2t/build/._lib
- __MACOSX/fabricflownet_supplement/code/baselines/Fabric-VSF/fabric_vsf/vismpc/t2t/build/._scripts-3.5
- __MACOSX/fabricflownet_supplement/code/baselines/Fabric-VSF/fabric_vsf/vismpc/t2t/build/lib/._tensor2tensor
- __MACOSX/fabricflownet_supplement/code/baselines/Fabric-VSF/fabric_vsf/vismpc/t2t/build/lib/tensor2tensor/.___init__.py
- __MACOSX/fabricflownet_supplement/code/baselines/Fabric-VSF/fabric_vsf/vismpc/t2t/build/lib/tensor2tensor/._bin
- __MACOSX/fabricflownet_supplement/code/baselines/Fabric-VSF/fabric_vsf/vismpc/t2t/build/lib/tensor2tensor/._data_generators
- __MACOSX/fabricflownet_supplement/code/baselines/Fabric-VSF/fabric_vsf/vismpc/t2t/build/lib/tensor2tensor/._envs
- __MACOSX/fabricflownet_supplement/code/baselines/Fabric-VSF/fabric_vsf/vismpc/t2t/build/lib/tensor2tensor/._insights
- __MACOSX/fabricflownet_supplement/code/baselines/Fabric-VSF/fabric_vsf/vismpc/t2t/build/lib/tensor2tensor/._keras
- __MACOSX/fabricflownet_supplement/code/baselines/Fabric-VSF/fabric_vsf/vismpc/t2t/build/lib/tensor2tensor/._layers
- __MACOSX/fabricflownet_supplement/code/baselines/Fabric-VSF/fabric_vsf/vismpc/t2t/build/lib/tensor2tensor/._metrics
- __MACOSX/fabricflownet_supplement/code/baselines/Fabric-VSF/fabric_vsf/vismpc/t2t/build/lib/tensor2tensor/._models
- __MACOSX/fabricflownet_supplement/code/baselines/Fabric-VSF/fabric_vsf/vismpc/t2t/build/lib/tensor2tensor/._problems.py
- __MACOSX/fabricflownet_supplement/code/baselines/Fabric-VSF/fabric_vsf/vismpc/t2t/build/lib/tensor2tensor/._problems_colab.py
- __MACOSX/fabricflownet_supplement/code/baselines/Fabric-VSF/fabric_vsf/vismpc/t2t/build/lib/tensor2tensor/._problems_test.py
- __MACOSX/fabricflownet_supplement/code/baselines/Fabric-VSF/fabric_vsf/vismpc/t2t/build/lib/tensor2tensor/._rl
- __MACOSX/fabricflownet_supplement/code/baselines/Fabric-VSF/fabric_vsf/vismpc/t2t/build/lib/tensor2tensor/._serving
- __MACOSX/fabricflownet_supplement/code/baselines/Fabric-VSF/fabric_vsf/vismpc/t2t/build/lib/tensor2tensor/._trax
- __MACOSX/fabricflownet_supplement/code/baselines/Fabric-VSF/fabric_vsf/vismpc/t2t/build/lib/tensor2tensor/._utils
- __MACOSX/fabricflownet_supplement/code/baselines/Fabric-VSF/fabric_vsf/vismpc/t2t/build/lib/tensor2tensor/._visualization
- __MACOSX/fabricflownet_supplement/code/baselines/Fabric-VSF/fabric_vsf/vismpc/t2t/build/lib/tensor2tensor/bin/.___init__.py
- __MACOSX/fabricflownet_supplement/code/baselines/Fabric-VSF/fabric_vsf/vismpc/t2t/build/lib/tensor2tensor/bin/._build_vocab.py
- __MACOSX/fabricflownet_supplement/code/baselines/Fabric-VSF/fabric_vsf/vismpc/t2t/build/lib/tensor2tensor/bin/._make_tf_configs.py
- __MACOSX/fabricflownet_supplement/code/baselines/Fabric-VSF/fabric_vsf/vismpc/t2t/build/lib/tensor2tensor/bin/._t2t_attack.py
- __MACOSX/fabricflownet_supplement/code/baselines/Fabric-VSF/fabric_vsf/vismpc/t2t/build/lib/tensor2tensor/bin/._t2t_avg_all.py
- __MACOSX/fabricflownet_supplement/code/baselines/Fabric-VSF/fabric_vsf/vismpc/t2t/build/lib/tensor2tensor/bin/._t2t_bleu.py
- __MACOSX/fabricflownet_supplement/code/baselines/Fabric-VSF/fabric_vsf/vismpc/t2t/build/lib/tensor2tensor/bin/._t2t_datagen.py
- __MACOSX/fabricflownet_supplement/code/baselines/Fabric-VSF/fabric_vsf/vismpc/t2t/build/lib/tensor2tensor/bin/._t2t_decoder.py
- __MACOSX/fabricflownet_supplement/code/baselines/Fabric-VSF/fabric_vsf/vismpc/t2t/build/lib/tensor2tensor/bin/._t2t_distill.py
- __MACOSX/fabricflownet_supplement/code/baselines/Fabric-VSF/fabric_vsf/vismpc/t2t/build/lib/tensor2tensor/bin/._t2t_eval.py
- __MACOSX/fabricflownet_supplement/code/baselines/Fabric-VSF/fabric_vsf/vismpc/t2t/build/lib/tensor2tensor/bin/._t2t_prune.py
- __MACOSX/fabricflownet_supplement/code/baselines/Fabric-VSF/fabric_vsf/vismpc/t2t/build/lib/tensor2tensor/bin/._t2t_trainer.py
- __MACOSX/fabricflownet_supplement/code/baselines/Fabric-VSF/fabric_vsf/vismpc/t2t/build/lib/tensor2tensor/bin/._t2t_trainer_test.py
- __MACOSX/fabricflownet_supplement/code/baselines/Fabric-VSF/fabric_vsf/vismpc/t2t/build/lib/tensor2tensor/bin/._t2t_translate_all.py
- __MACOSX/fabricflownet_supplement/code/baselines/Fabric-VSF/fabric_vsf/vismpc/t2t/build/lib/tensor2tensor/data_generators/.___init__.py
- __MACOSX/fabricflownet_supplement/code/baselines/Fabric-VSF/fabric_vsf/vismpc/t2t/build/lib/tensor2tensor/data_generators/._algorithmic.py
- __MACOSX/fabricflownet_supplement/code/baselines/Fabric-VSF/fabric_vsf/vismpc/t2t/build/lib/tensor2tensor/data_generators/._algorithmic_math.py
- __MACOSX/fabricflownet_supplement/code/baselines/Fabric-VSF/fabric_vsf/vismpc/t2t/build/lib/tensor2tensor/data_generators/._algorithmic_math_deepmind.py
- __MACOSX/fabricflownet_supplement/code/baselines/Fabric-VSF/fabric_vsf/vismpc/t2t/build/lib/tensor2tensor/data_generators/._algorithmic_math_test.py
- __MACOSX/fabricflownet_supplement/code/baselines/Fabric-VSF/fabric_vsf/vismpc/t2t/build/lib/tensor2tensor/data_generators/._algorithmic_math_two_variables.py
- __MACOSX/fabricflownet_supplement/code/baselines/Fabric-VSF/fabric_vsf/vismpc/t2t/build/lib/tensor2tensor/data_generators/._algorithmic_test.py
- __MACOSX/fabricflownet_supplement/code/baselines/Fabric-VSF/fabric_vsf/vismpc/t2t/build/lib/tensor2tensor/data_generators/._all_problems.py
- __MACOSX/fabricflownet_supplement/code/baselines/Fabric-VSF/fabric_vsf/vismpc/t2t/build/lib/tensor2tensor/data_generators/._allen_brain.py
- __MACOSX/fabricflownet_supplement/code/baselines/Fabric-VSF/fabric_vsf/vismpc/t2t/build/lib/tensor2tensor/data_generators/._allen_brain_test.py
- __MACOSX/fabricflownet_supplement/code/baselines/Fabric-VSF/fabric_vsf/vismpc/t2t/build/lib/tensor2tensor/data_generators/._audio.py
- __MACOSX/fabricflownet_supplement/code/baselines/Fabric-VSF/fabric_vsf/vismpc/t2t/build/lib/tensor2tensor/data_generators/._audio_encoder.py
- __MACOSX/fabricflownet_supplement/code/baselines/Fabric-VSF/fabric_vsf/vismpc/t2t/build/lib/tensor2tensor/data_generators/._audio_test.py
- __MACOSX/fabricflownet_supplement/code/baselines/Fabric-VSF/fabric_vsf/vismpc/t2t/build/lib/tensor2tensor/data_generators/._babi_qa.py
- __MACOSX/fabricflownet_supplement/code/baselines/Fabric-VSF/fabric_vsf/vismpc/t2t/build/lib/tensor2tensor/data_generators/._bair_robot_pushing.py
- __MACOSX/fabricflownet_supplement/code/baselines/Fabric-VSF/fabric_vsf/vismpc/t2t/build/lib/tensor2tensor/data_generators/._celeba.py
- __MACOSX/fabricflownet_supplement/code/baselines/Fabric-VSF/fabric_vsf/vismpc/t2t/build/lib/tensor2tensor/data_generators/._celeba_test.py
- __MACOSX/fabricflownet_supplement/code/baselines/Fabric-VSF/fabric_vsf/vismpc/t2t/build/lib/tensor2tensor/data_generators/._celebahq.py
- __MACOSX/fabricflownet_supplement/code/baselines/Fabric-VSF/fabric_vsf/vismpc/t2t/build/lib/tensor2tensor/data_generators/._cifar.py
- __MACOSX/fabricflownet_supplement/code/baselines/Fabric-VSF/fabric_vsf/vismpc/t2t/build/lib/tensor2tensor/data_generators/._cipher.py
- __MACOSX/fabricflownet_supplement/code/baselines/Fabric-VSF/fabric_vsf/vismpc/t2t/build/lib/tensor2tensor/data_generators/._cleaner_en_xx.py
- __MACOSX/fabricflownet_supplement/code/baselines/Fabric-VSF/fabric_vsf/vismpc/t2t/build/lib/tensor2tensor/data_generators/._cloth.py
- __MACOSX/fabricflownet_supplement/code/baselines/Fabric-VSF/fabric_vsf/vismpc/t2t/build/lib/tensor2tensor/data_generators/._cnn_dailymail.py
- __MACOSX/fabricflownet_supplement/code/baselines/Fabric-VSF/fabric_vsf/vismpc/t2t/build/lib/tensor2tensor/data_generators/._cola.py
- __MACOSX/fabricflownet_supplement/code/baselines/Fabric-VSF/fabric_vsf/vismpc/t2t/build/lib/tensor2tensor/data_generators/._common_voice.py
- __MACOSX/fabricflownet_supplement/code/baselines/Fabric-VSF/fabric_vsf/vismpc/t2t/build/lib/tensor2tensor/data_generators/._common_voice_test.py
- __MACOSX/fabricflownet_supplement/code/baselines/Fabric-VSF/fabric_vsf/vismpc/t2t/build/lib/tensor2tensor/data_generators/._conll_ner.py
- __MACOSX/fabricflownet_supplement/code/baselines/Fabric-VSF/fabric_vsf/vismpc/t2t/build/lib/tensor2tensor/data_generators/._desc2code.py
- __MACOSX/fabricflownet_supplement/code/baselines/Fabric-VSF/fabric_vsf/vismpc/t2t/build/lib/tensor2tensor/data_generators/._desc2code_test.py
- __MACOSX/fabricflownet_supplement/code/baselines/Fabric-VSF/fabric_vsf/vismpc/t2t/build/lib/tensor2tensor/data_generators/._dna_encoder.py
- __MACOSX/fabricflownet_supplement/code/baselines/Fabric-VSF/fabric_vsf/vismpc/t2t/build/lib/tensor2tensor/data_generators/._dna_encoder_test.py
- __MACOSX/fabricflownet_supplement/code/baselines/Fabric-VSF/fabric_vsf/vismpc/t2t/build/lib/tensor2tensor/data_generators/._fsns.py
- __MACOSX/fabricflownet_supplement/code/baselines/Fabric-VSF/fabric_vsf/vismpc/t2t/build/lib/tensor2tensor/data_generators/._function_docstring.py
- __MACOSX/fabricflownet_supplement/code/baselines/Fabric-VSF/fabric_vsf/vismpc/t2t/build/lib/tensor2tensor/data_generators/._gene_expression.py
- __MACOSX/fabricflownet_supplement/code/baselines/Fabric-VSF/fabric_vsf/vismpc/t2t/build/lib/tensor2tensor/data_generators/._gene_expression_test.py
- __MACOSX/fabricflownet_supplement/code/baselines/Fabric-VSF/fabric_vsf/vismpc/t2t/build/lib/tensor2tensor/data_generators/._generator_utils.py
- __MACOSX/fabricflownet_supplement/code/baselines/Fabric-VSF/fabric_vsf/vismpc/t2t/build/lib/tensor2tensor/data_generators/._generator_utils_test.py
- __MACOSX/fabricflownet_supplement/code/baselines/Fabric-VSF/fabric_vsf/vismpc/t2t/build/lib/tensor2tensor/data_generators/._google_robot_pushing.py
- __MACOSX/fabricflownet_supplement/code/baselines/Fabric-VSF/fabric_vsf/vismpc/t2t/build/lib/tensor2tensor/data_generators/._gym_env.py
- __MACOSX/fabricflownet_supplement/code/baselines/Fabric-VSF/fabric_vsf/vismpc/t2t/build/lib/tensor2tensor/data_generators/._gym_env_test.py
- __MACOSX/fabricflownet_supplement/code/baselines/Fabric-VSF/fabric_vsf/vismpc/t2t/build/lib/tensor2tensor/data_generators/._ice_parsing.py
- __MACOSX/fabricflownet_supplement/code/baselines/Fabric-VSF/fabric_vsf/vismpc/t2t/build/lib/tensor2tensor/data_generators/._image_lsun.py
- __MACOSX/fabricflownet_supplement/code/baselines/Fabric-VSF/fabric_vsf/vismpc/t2t/build/lib/tensor2tensor/data_generators/._image_utils.py
- __MACOSX/fabricflownet_supplement/code/baselines/Fabric-VSF/fabric_vsf/vismpc/t2t/build/lib/tensor2tensor/data_generators/._image_utils_test.py
- __MACOSX/fabricflownet_supplement/code/baselines/Fabric-VSF/fabric_vsf/vismpc/t2t/build/lib/tensor2tensor/data_generators/._imagenet.py
- __MACOSX/fabricflownet_supplement/code/baselines/Fabric-VSF/fabric_vsf/vismpc/t2t/build/lib/tensor2tensor/data_generators/._imagenet_test.py
- __MACOSX/fabricflownet_supplement/code/baselines/Fabric-VSF/fabric_vsf/vismpc/t2t/build/lib/tensor2tensor/data_generators/._imdb.py
- __MACOSX/fabricflownet_supplement/code/baselines/Fabric-VSF/fabric_vsf/vismpc/t2t/build/lib/tensor2tensor/data_generators/._inspect_tfrecord.py
- __MACOSX/fabricflownet_supplement/code/baselines/Fabric-VSF/fabric_vsf/vismpc/t2t/build/lib/tensor2tensor/data_generators/._lambada.py
- __MACOSX/fabricflownet_supplement/code/baselines/Fabric-VSF/fabric_vsf/vismpc/t2t/build/lib/tensor2tensor/data_generators/._librispeech.py
- __MACOSX/fabricflownet_supplement/code/baselines/Fabric-VSF/fabric_vsf/vismpc/t2t/build/lib/tensor2tensor/data_generators/._lm1b.py
- __MACOSX/fabricflownet_supplement/code/baselines/Fabric-VSF/fabric_vsf/vismpc/t2t/build/lib/tensor2tensor/data_generators/._lm1b_imdb.py
- __MACOSX/fabricflownet_supplement/code/baselines/Fabric-VSF/fabric_vsf/vismpc/t2t/build/lib/tensor2tensor/data_generators/._lm1b_mnli.py
- __MACOSX/fabricflownet_supplement/code/baselines/Fabric-VSF/fabric_vsf/vismpc/t2t/build/lib/tensor2tensor/data_generators/._mnist.py
- __MACOSX/fabricflownet_supplement/code/baselines/Fabric-VSF/fabric_vsf/vismpc/t2t/build/lib/tensor2tensor/data_generators/._moving_mnist.py
- __MACOSX/fabricflownet_supplement/code/baselines/Fabric-VSF/fabric_vsf/vismpc/t2t/build/lib/tensor2tensor/data_generators/._mrpc.py
- __MACOSX/fabricflownet_supplement/code/baselines/Fabric-VSF/fabric_vsf/vismpc/t2t/build/lib/tensor2tensor/data_generators/._mscoco.py
- __MACOSX/fabricflownet_supplement/code/baselines/Fabric-VSF/fabric_vsf/vismpc/t2t/build/lib/tensor2tensor/data_generators/._mscoco_test.py
- __MACOSX/fabricflownet_supplement/code/baselines/Fabric-VSF/fabric_vsf/vismpc/t2t/build/lib/tensor2tensor/data_generators/._multi_problem.py
- __MACOSX/fabricflownet_supplement/code/baselines/Fabric-VSF/fabric_vsf/vismpc/t2t/build/lib/tensor2tensor/data_generators/._multi_problem_v2.py
- __MACOSX/fabricflownet_supplement/code/baselines/Fabric-VSF/fabric_vsf/vismpc/t2t/build/lib/tensor2tensor/data_generators/._multi_problem_v2_test.py
- __MACOSX/fabricflownet_supplement/code/baselines/Fabric-VSF/fabric_vsf/vismpc/t2t/build/lib/tensor2tensor/data_generators/._multinli.py
- __MACOSX/fabricflownet_supplement/code/baselines/Fabric-VSF/fabric_vsf/vismpc/t2t/build/lib/tensor2tensor/data_generators/._ocr.py
- __MACOSX/fabricflownet_supplement/code/baselines/Fabric-VSF/fabric_vsf/vismpc/t2t/build/lib/tensor2tensor/data_generators/._paraphrase_ms_coco.py
- __MACOSX/fabricflownet_supplement/code/baselines/Fabric-VSF/fabric_vsf/vismpc/t2t/build/lib/tensor2tensor/data_generators/._paraphrase_ms_coco_test.py
- __MACOSX/fabricflownet_supplement/code/baselines/Fabric-VSF/fabric_vsf/vismpc/t2t/build/lib/tensor2tensor/data_generators/._pointer_generator_word.py
- __MACOSX/fabricflownet_supplement/code/baselines/Fabric-VSF/fabric_vsf/vismpc/t2t/build/lib/tensor2tensor/data_generators/._problem.py
- __MACOSX/fabricflownet_supplement/code/baselines/Fabric-VSF/fabric_vsf/vismpc/t2t/build/lib/tensor2tensor/data_generators/._problem_hparams.py
- __MACOSX/fabricflownet_supplement/code/baselines/Fabric-VSF/fabric_vsf/vismpc/t2t/build/lib/tensor2tensor/data_generators/._problem_test.py
- __MACOSX/fabricflownet_supplement/code/baselines/Fabric-VSF/fabric_vsf/vismpc/t2t/build/lib/tensor2tensor/data_generators/._program_search.py
- __MACOSX/fabricflownet_supplement/code/baselines/Fabric-VSF/fabric_vsf/vismpc/t2t/build/lib/tensor2tensor/data_generators/._program_search_test.py
- __MACOSX/fabricflownet_supplement/code/baselines/Fabric-VSF/fabric_vsf/vismpc/t2t/build/lib/tensor2tensor/data_generators/._ptb.py
- __MACOSX/fabricflownet_supplement/code/baselines/Fabric-VSF/fabric_vsf/vismpc/t2t/build/lib/tensor2tensor/data_generators/._qnli.py
- __MACOSX/fabricflownet_supplement/code/baselines/Fabric-VSF/fabric_vsf/vismpc/t2t/build/lib/tensor2tensor/data_generators/._quora_qpairs.py
- __MACOSX/fabricflownet_supplement/code/baselines/Fabric-VSF/fabric_vsf/vismpc/t2t/build/lib/tensor2tensor/data_generators/._rte.py
- __MACOSX/fabricflownet_supplement/code/baselines/Fabric-VSF/fabric_vsf/vismpc/t2t/build/lib/tensor2tensor/data_generators/._saved_visual_foresight.py
- __MACOSX/fabricflownet_supplement/code/baselines/Fabric-VSF/fabric_vsf/vismpc/t2t/build/lib/tensor2tensor/data_generators/._scitail.py
- __MACOSX/fabricflownet_supplement/code/baselines/Fabric-VSF/fabric_vsf/vismpc/t2t/build/lib/tensor2tensor/data_generators/._snli.py
- __MACOSX/fabricflownet_supplement/code/baselines/Fabric-VSF/fabric_vsf/vismpc/t2t/build/lib/tensor2tensor/data_generators/._speech_recognition.py
- __MACOSX/fabricflownet_supplement/code/baselines/Fabric-VSF/fabric_vsf/vismpc/t2t/build/lib/tensor2tensor/data_generators/._squad.py
- __MACOSX/fabricflownet_supplement/code/baselines/Fabric-VSF/fabric_vsf/vismpc/t2t/build/lib/tensor2tensor/data_generators/._sst_binary.py
- __MACOSX/fabricflownet_supplement/code/baselines/Fabric-VSF/fabric_vsf/vismpc/t2t/build/lib/tensor2tensor/data_generators/._stanford_nli.py
- __MACOSX/fabricflownet_supplement/code/baselines/Fabric-VSF/fabric_vsf/vismpc/t2t/build/lib/tensor2tensor/data_generators/._style_transfer.py
- __MACOSX/fabricflownet_supplement/code/baselines/Fabric-VSF/fabric_vsf/vismpc/t2t/build/lib/tensor2tensor/data_generators/._style_transfer_test.py
- __MACOSX/fabricflownet_supplement/code/baselines/Fabric-VSF/fabric_vsf/vismpc/t2t/build/lib/tensor2tensor/data_generators/._subject_verb_agreement.py
- __MACOSX/fabricflownet_supplement/code/baselines/Fabric-VSF/fabric_vsf/vismpc/t2t/build/lib/tensor2tensor/data_generators/._test_data
- __MACOSX/fabricflownet_supplement/code/baselines/Fabric-VSF/fabric_vsf/vismpc/t2t/build/lib/tensor2tensor/data_generators/._text_encoder.py
- __MACOSX/fabricflownet_supplement/code/baselines/Fabric-VSF/fabric_vsf/vismpc/t2t/build/lib/tensor2tensor/data_generators/._text_encoder_build_subword.py
- __MACOSX/fabricflownet_supplement/code/baselines/Fabric-VSF/fabric_vsf/vismpc/t2t/build/lib/tensor2tensor/data_generators/._text_encoder_test.py
- __MACOSX/fabricflownet_supplement/code/baselines/Fabric-VSF/fabric_vsf/vismpc/t2t/build/lib/tensor2tensor/data_generators/._text_problems.py
- __MACOSX/fabricflownet_supplement/code/baselines/Fabric-VSF/fabric_vsf/vismpc/t2t/build/lib/tensor2tensor/data_generators/._text_problems_test.py
- __MACOSX/fabricflownet_supplement/code/baselines/Fabric-VSF/fabric_vsf/vismpc/t2t/build/lib/tensor2tensor/data_generators/._timeseries.py
- __MACOSX/fabricflownet_supplement/code/baselines/Fabric-VSF/fabric_vsf/vismpc/t2t/build/lib/tensor2tensor/data_generators/._timeseries_data_generator.py
- __MACOSX/fabricflownet_supplement/code/baselines/Fabric-VSF/fabric_vsf/vismpc/t2t/build/lib/tensor2tensor/data_generators/._timeseries_data_generator_test.py
- __MACOSX/fabricflownet_supplement/code/baselines/Fabric-VSF/fabric_vsf/vismpc/t2t/build/lib/tensor2tensor/data_generators/._timeseries_test.py
- __MACOSX/fabricflownet_supplement/code/baselines/Fabric-VSF/fabric_vsf/vismpc/t2t/build/lib/tensor2tensor/data_generators/._tokenizer.py
- __MACOSX/fabricflownet_supplement/code/baselines/Fabric-VSF/fabric_vsf/vismpc/t2t/build/lib/tensor2tensor/data_generators/._tokenizer_test.py
- __MACOSX/fabricflownet_supplement/code/baselines/Fabric-VSF/fabric_vsf/vismpc/t2t/build/lib/tensor2tensor/data_generators/._transduction_problems.py
- __MACOSX/fabricflownet_supplement/code/baselines/Fabric-VSF/fabric_vsf/vismpc/t2t/build/lib/tensor2tensor/data_generators/._transduction_problems_test.py
- __MACOSX/fabricflownet_supplement/code/baselines/Fabric-VSF/fabric_vsf/vismpc/t2t/build/lib/tensor2tensor/data_generators/._translate.py
- __MACOSX/fabricflownet_supplement/code/baselines/Fabric-VSF/fabric_vsf/vismpc/t2t/build/lib/tensor2tensor/data_generators/._translate_encs.py
- __MACOSX/fabricflownet_supplement/code/baselines/Fabric-VSF/fabric_vsf/vismpc/t2t/build/lib/tensor2tensor/data_generators/._translate_ende.py
- __MACOSX/fabricflownet_supplement/code/baselines/Fabric-VSF/fabric_vsf/vismpc/t2t/build/lib/tensor2tensor/data_generators/._translate_ende_test.py
- __MACOSX/fabricflownet_supplement/code/baselines/Fabric-VSF/fabric_vsf/vismpc/t2t/build/lib/tensor2tensor/data_generators/._translate_enes.py
- __MACOSX/fabricflownet_supplement/code/baselines/Fabric-VSF/fabric_vsf/vismpc/t2t/build/lib/tensor2tensor/data_generators/._translate_enet.py
- __MACOSX/fabricflownet_supplement/code/baselines/Fabric-VSF/fabric_vsf/vismpc/t2t/build/lib/tensor2tensor/data_generators/._translate_enfr.py
- __MACOSX/fabricflownet_supplement/code/baselines/Fabric-VSF/fabric_vsf/vismpc/t2t/build/lib/tensor2tensor/data_generators/._translate_enid.py
- __MACOSX/fabricflownet_supplement/code/baselines/Fabric-VSF/fabric_vsf/vismpc/t2t/build/lib/tensor2tensor/data_generators/._translate_enmk.py
- __MACOSX/fabricflownet_supplement/code/baselines/Fabric-VSF/fabric_vsf/vismpc/t2t/build/lib/tensor2tensor/data_generators/._translate_enro.py
- __MACOSX/fabricflownet_supplement/code/baselines/Fabric-VSF/fabric_vsf/vismpc/t2t/build/lib/tensor2tensor/data_generators/._translate_entn.py
- __MACOSX/fabricflownet_supplement/code/baselines/Fabric-VSF/fabric_vsf/vismpc/t2t/build/lib/tensor2tensor/data_generators/._translate_envi.py
- __MACOSX/fabricflownet_supplement/code/baselines/Fabric-VSF/fabric_vsf/vismpc/t2t/build/lib/tensor2tensor/data_generators/._translate_enzh.py
- __MACOSX/fabricflownet_supplement/code/baselines/Fabric-VSF/fabric_vsf/vismpc/t2t/build/lib/tensor2tensor/data_generators/._translate_test.py
- __MACOSX/fabricflownet_supplement/code/baselines/Fabric-VSF/fabric_vsf/vismpc/t2t/build/lib/tensor2tensor/data_generators/._video_generated.py
[truncated: 1,309 more entries]
